# Supplementary material
Source: PubMed Central journal article supplement (PMC4290921)
Supplement: JCM.02589-14_zjm999093959so1.pdf [file JCM.02589-14_zjm999093959so1.pdf]

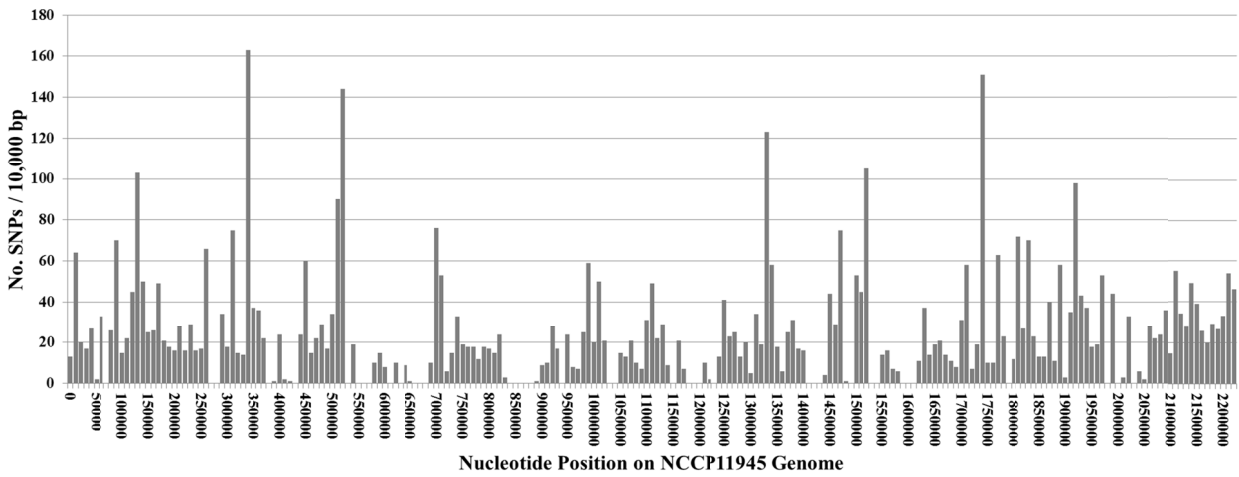

Supplemental Figure S1: Single Nucleotide Polymorphism (SNP) density of 179 *N. gonorrhoeae* strains across the NCCP11945 genome. Regions with > 90 SNPs/10000 base pairs (except the *porB* region) were removed from downstream SNP analysis and are listed in Supplemental Table S1.

Supplemental Table S1: Suspected recombination events removed from the core SNP phylogenomic analysis.

| Start <sup>(a)</sup> | Stop <sup>(a)</sup> | Locus                                                                 |
|----------------------|---------------------|-----------------------------------------------------------------------|
| 344095               | 348876              | #NGK_0419-IgA-specific metalloendopeptidase (148 SNPs) <sup>(b)</sup> |
| 517391               | 518794              | #NGK_0622-replicative DNA helicase (31 SNPs)                          |
| 519086               | 519324              | #intergenic (23 SNPs)                                                 |
| 519746               | 520360              | #NGK_0624-putative type IV pilus assembly protein PilV (15 SNPs)      |
| 520357               | 521316              | #NGK_0625-hypothetical protein (25 SNPs)                              |
| 521908               | 522381              | #NGK_0627-Putative type IV pilin-like protein (37 SNPs)               |
| 523126               | 523407              | #NGK_0630-AzlC-like protein (25 SNPs)                                 |
| 523408               | 523561              | #intergenic (18 SNPs)                                                 |
| 995192               | 995844              | #intergenic (33 SNPs)                                                 |
| 1741076              | 1742944             | #NGK_2108-putative trans-acylase protein (81 SNPs)                    |

<sup>(a)</sup> Start and stop locations are positions of loci on the *N. gonorrhoeae* NCCP11945 genome with SNP density >90 SNPs/10,000 bp.

<sup>(b)</sup> Total SNPs in the specified NCCP11945 locus of all isolates.

Supplementary Table S2: SNP matrix of *N. gonorrhoeae* showing the number of SNPs between all pairs of isolates (MS-Excel).

Supplementary Table S3: Epidemiological metadata information associated with *N. gonorrhoeae* strains in the analysis (MS-Excel)



### Supplemental References:

1. **Ohnishi M, Golparian D, Shimuta K, Saika T, Hoshina S, Iwasaku K, Nakayama S-, Kitawaki J, Unemo M.** 2011. Is *Neisseria gonorrhoeae* initiating a future era of untreatable gonorrhoea?: Detailed characterization of the first strain with high-level resistance to ceftriaxone. *Antimicrob. Agents Chemother.* **55**:3538-3545. 10.1128/AAC.00325-11.
2. **Unemo M, Golparian D, Nicholas R, Ohnishi M, Galloway A, Sednaoui P.** 2012. High-level cefixime- and ceftriaxone-resistant *Neisseria gonorrhoeae* in France: Novel *penA* mosaic allele in a successful international clone causes treatment failure. *Antimicrob. Agents Chemother.* **56**:1273-1280. 10.1128/AAC.05760-11.
